# Supplementary material for: Genus-wide Yersinia core-genome multilocus sequence typing for species identification and strain characterization
Source: PubMed Central journal article supplement — Microb Genom. 2019 Oct 3;5(10):e000301. doi: 10.1099/mgen.0.000301 (PMC6861861; doi:10.1099/mgen.0.000301), 2019-10-03

**Figure S1.** Methodology chart

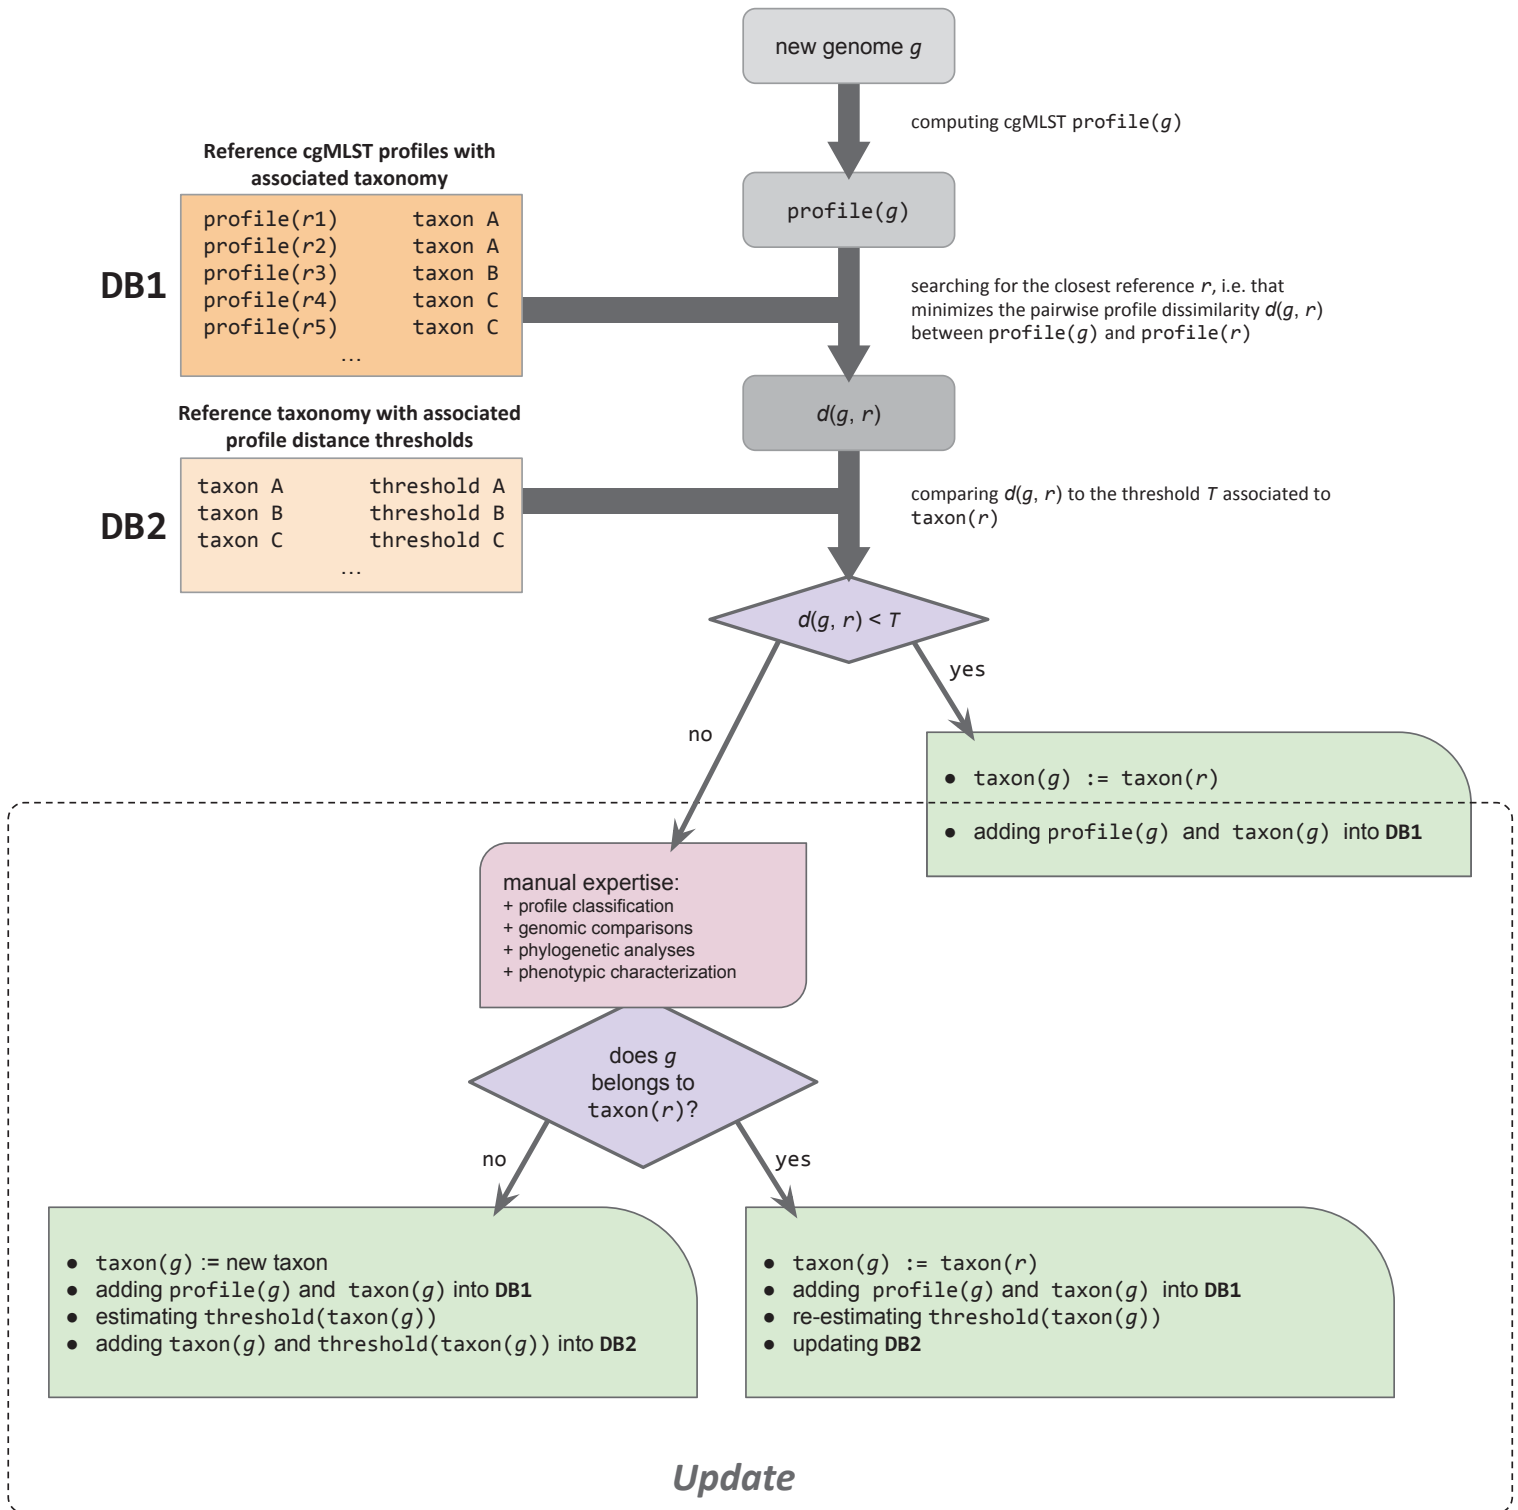

**Figure S2.** Maximum-likelihood phylogenetic tree of the *Yersinia* genus based on concatenated multiple sequence alignments of 7-gene MLST genes. Only bootstrap-based branch support values >70% are shown. Scale bar refers to 0.05 nucleotide substitutions per character.

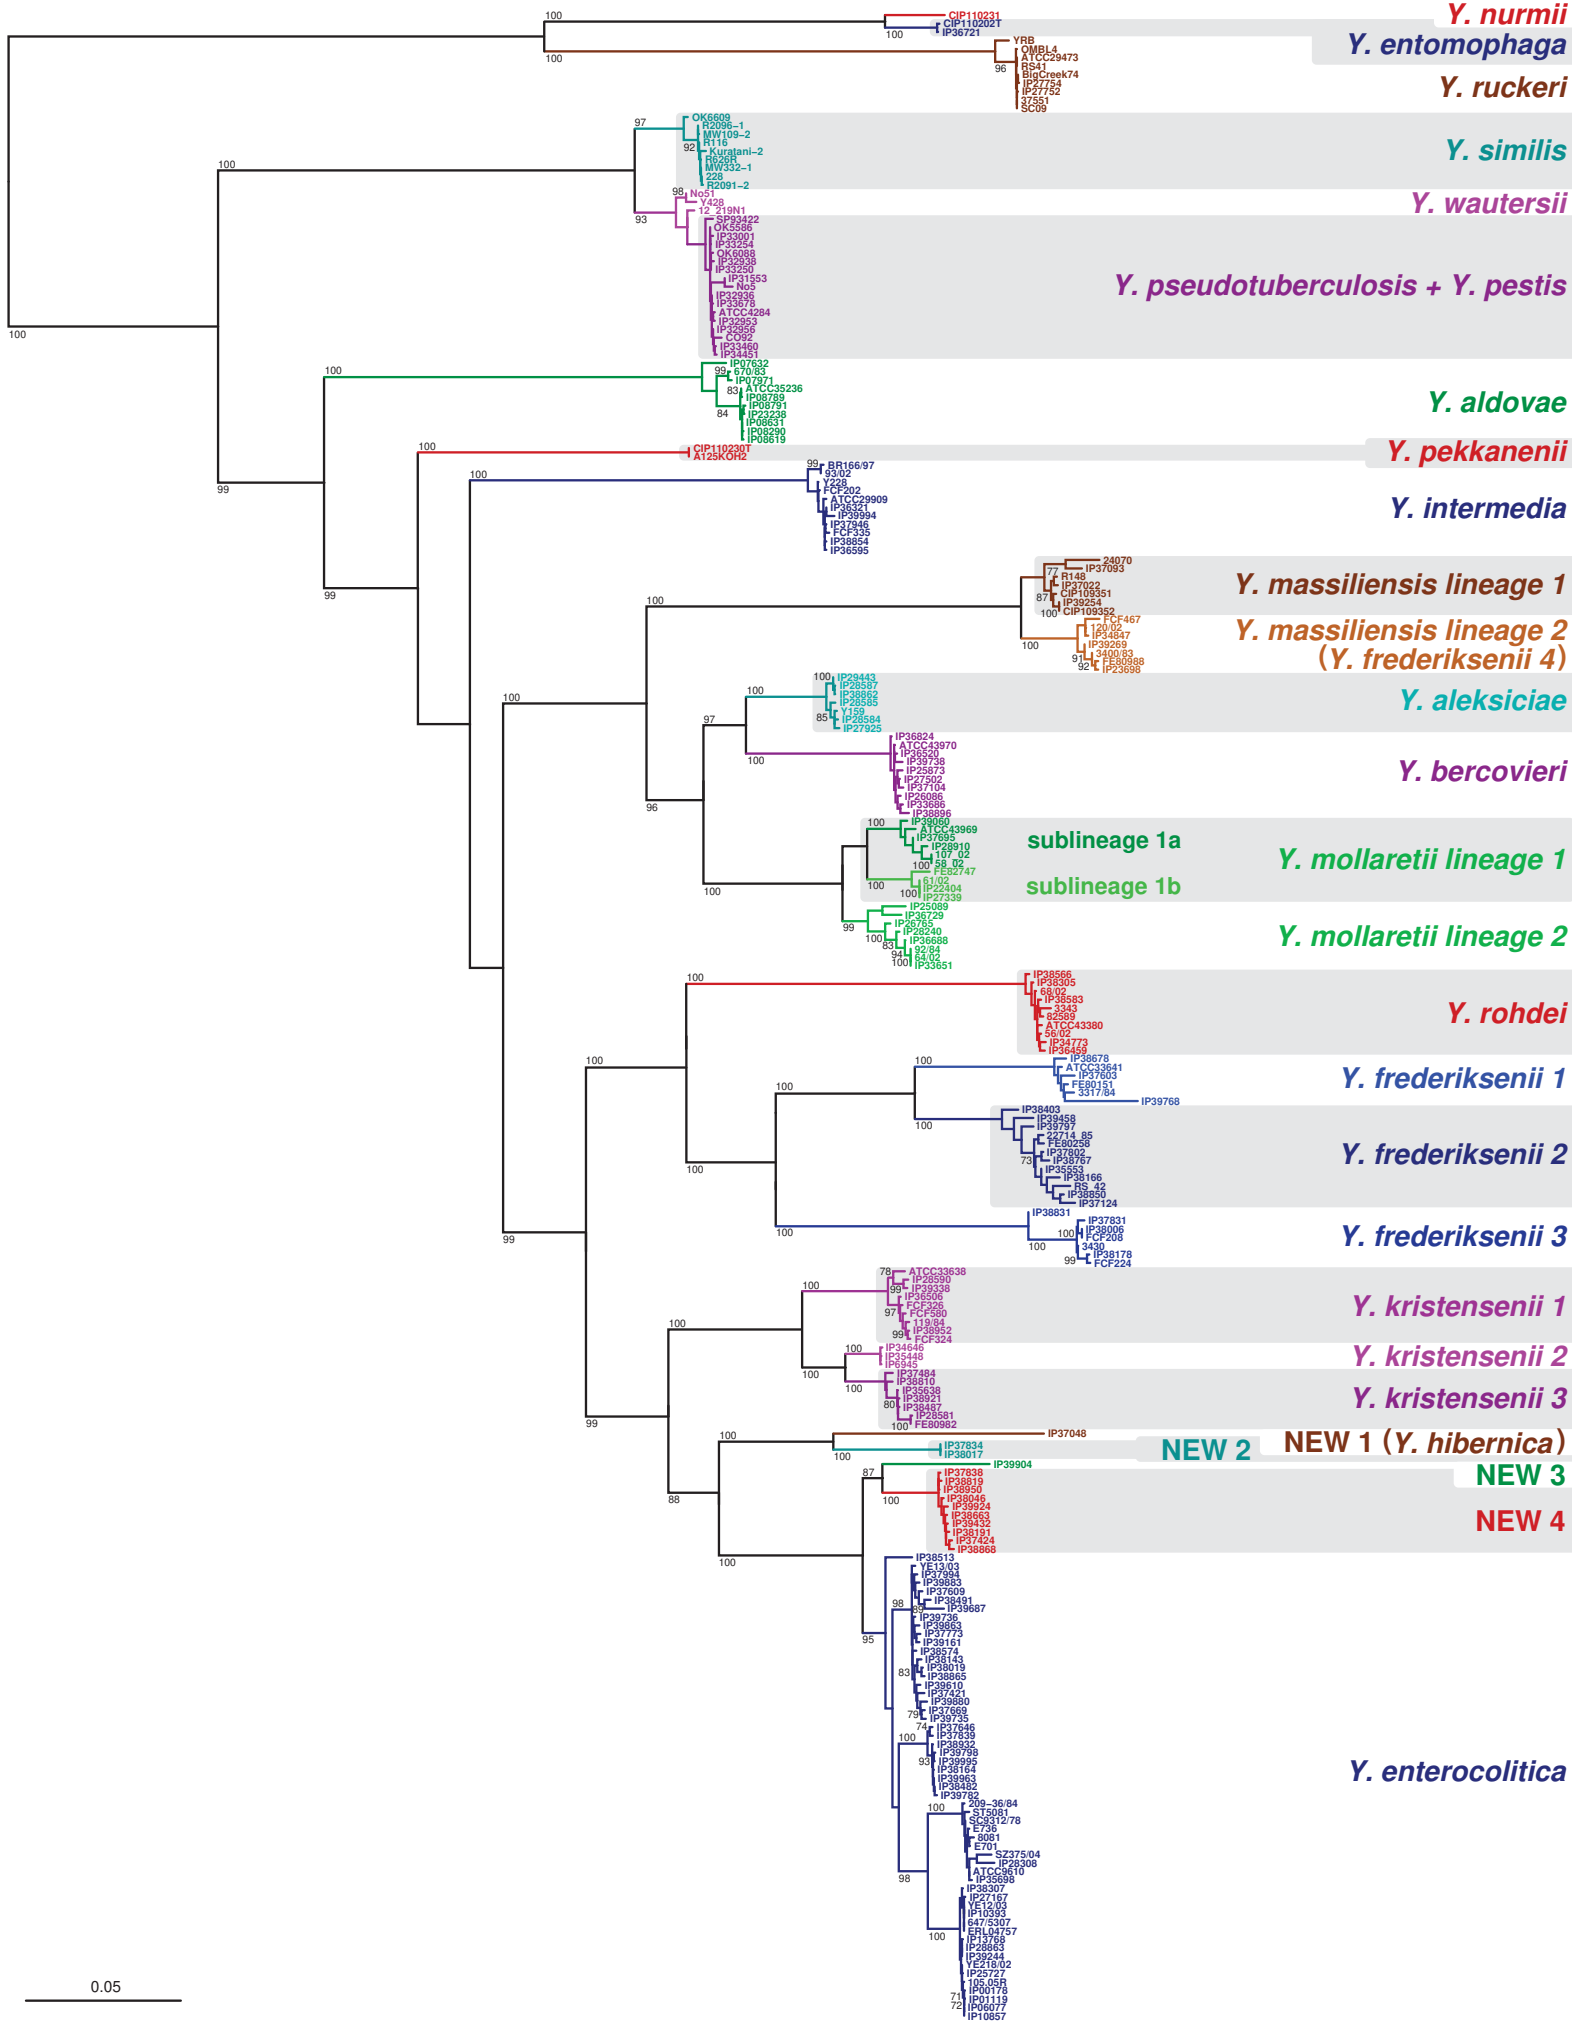

**Figure S3.** Identification procedure of *Yersinia* isolates on the public “Sequences and profiles database”:  
<https://bigsddb.pasteur.fr/yersinia/>

### Procedure for identification of *Yersinia* isolates

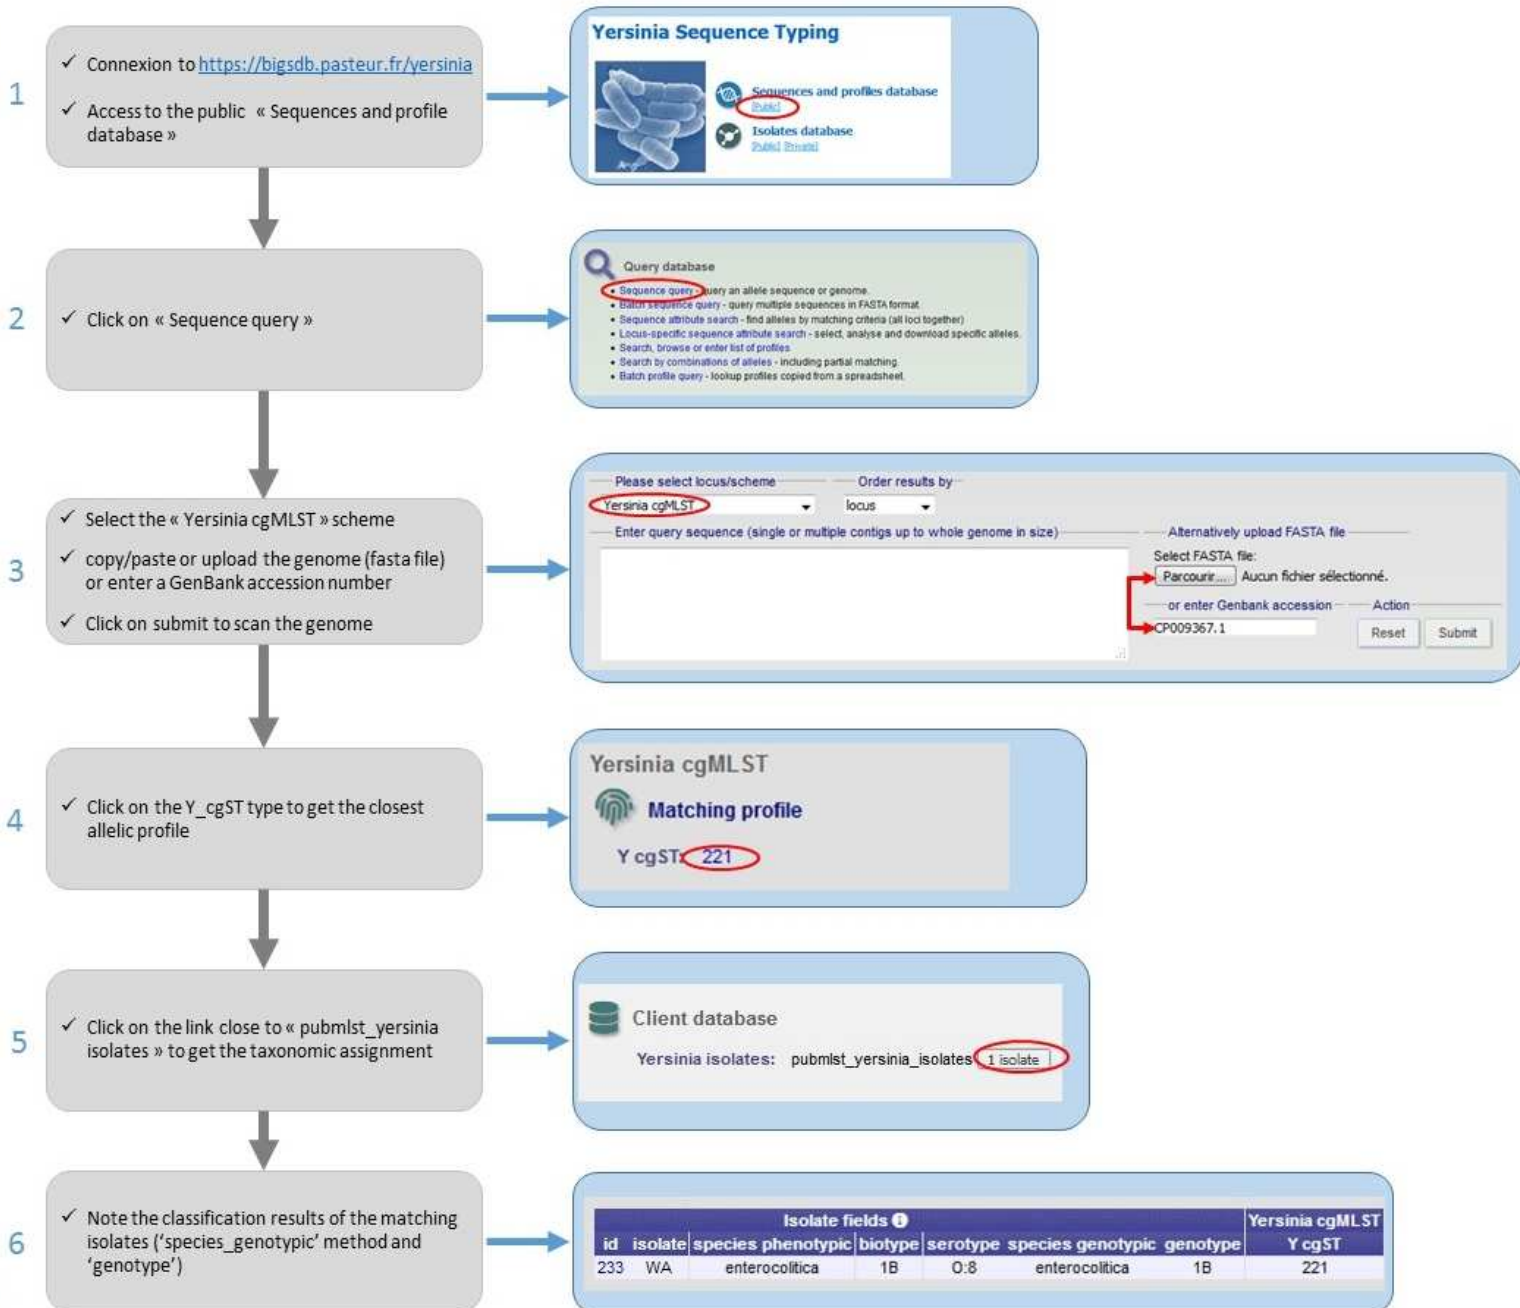

Supplement: mgen-5-301-s001.pdf [file mgen-5-301-s001.pdf]
